# Supplementary material for: Swelling and Viscoelastic Properties of Cellulose-Based Hydrogels Prepared by Free Radical Polymerization of Dimethylaminoethyl Methacrylate in Cellulose Solution
Source: MDPI journal article supplement (doi:10.3390/gels9020094), 2023-01-21
Supplement: s1 [file s1]

# Swelling and viscoelastic properties of cellulose based hydrogels prepared by free radical polymerization of dimethylaminoethyl methacrylate in cellulose solution

Roko Blažic<sup>1</sup>, Katarina Marušić<sup>2</sup>, Elvira Vidović<sup>1</sup>

<sup>1</sup>*University of Zagreb, Faculty of Chemical Engineering and Technology,  
Maruličev trg 19, HR-10000 Zagreb, Croatia*

<sup>2</sup>*Ruder Bošković Institute, Division of Materials Chemistry, Radiation Chemistry and Dosimetry Laboratory,  
Bijenička cesta 54, HR-10000, Zagreb, Croatia*

## Supplementary material

\*Correspondence to:

*E-mail address:* evidov@fkit.hr (Elvira Vidović), Maruličev trg 19, 10000 Zagreb, Croatia

**Table S1** Molar ratio of reactants (monomer (DMAEMA), crosslinking agent (MBA) and cellulose (cel)) and irradiation dose for prepared samples

| Sample  | $n(\text{cel})/n(\text{DMAEMA})$ | $n(\text{DMAEMA})/n(\text{MBA})$ | Irradiation dose (kGy) |
|---------|----------------------------------|----------------------------------|------------------------|
| 1-1 CP  | 1:1                              | 15:1                             | 0                      |
| 1-1-10  |                                  |                                  | 10                     |
| 1-1-30  |                                  |                                  | 30                     |
| 1-1-100 |                                  |                                  | 100                    |
| 1-3 CP  | 1:3                              | 15:1                             | 0                      |
| 1-3-10  |                                  |                                  | 10                     |
| 1-3-30  |                                  |                                  | 30                     |
| 1-3-100 |                                  |                                  | 100                    |
| 1-5 CP  | 1:5                              | 15:1                             | 0                      |
| 1-5-10  |                                  |                                  | 10                     |
| 1-5-30  |                                  |                                  | 30                     |
| 1-5-100 |                                  |                                  | 100                    |

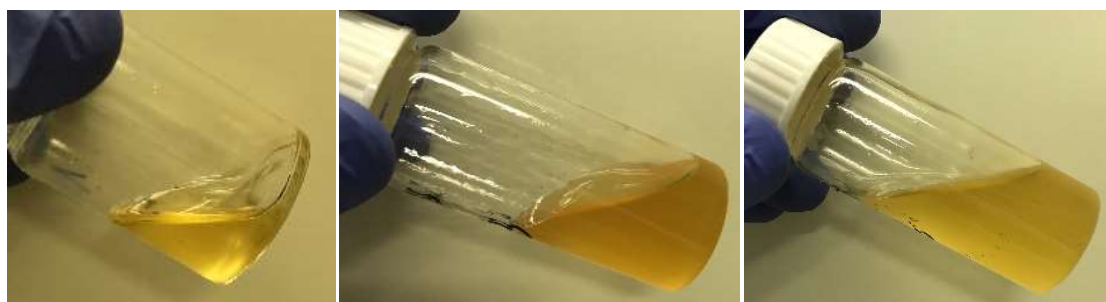

**Figure S1.** Reaction mixtures after polymerization a) sample 1-1 CP, b) 1-3 CP, c) 1-5 CP.

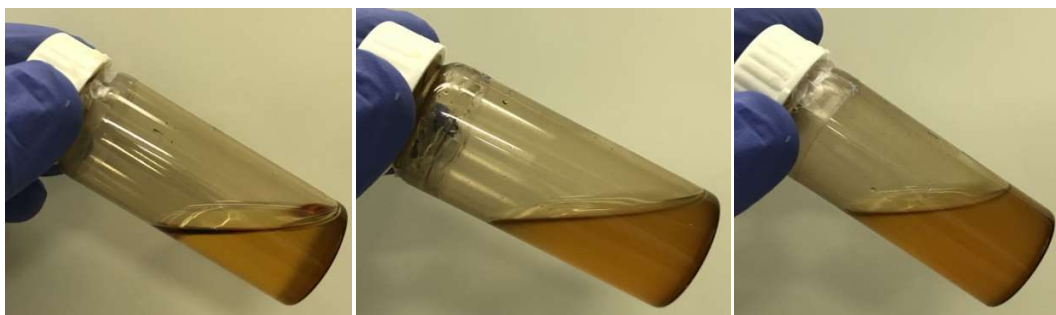

**Figure S2.** Reaction mixtures after irradiation with a dose of 100 kGy a) sample 1-1 100, b) 1-3 100, c) 1-5 100.

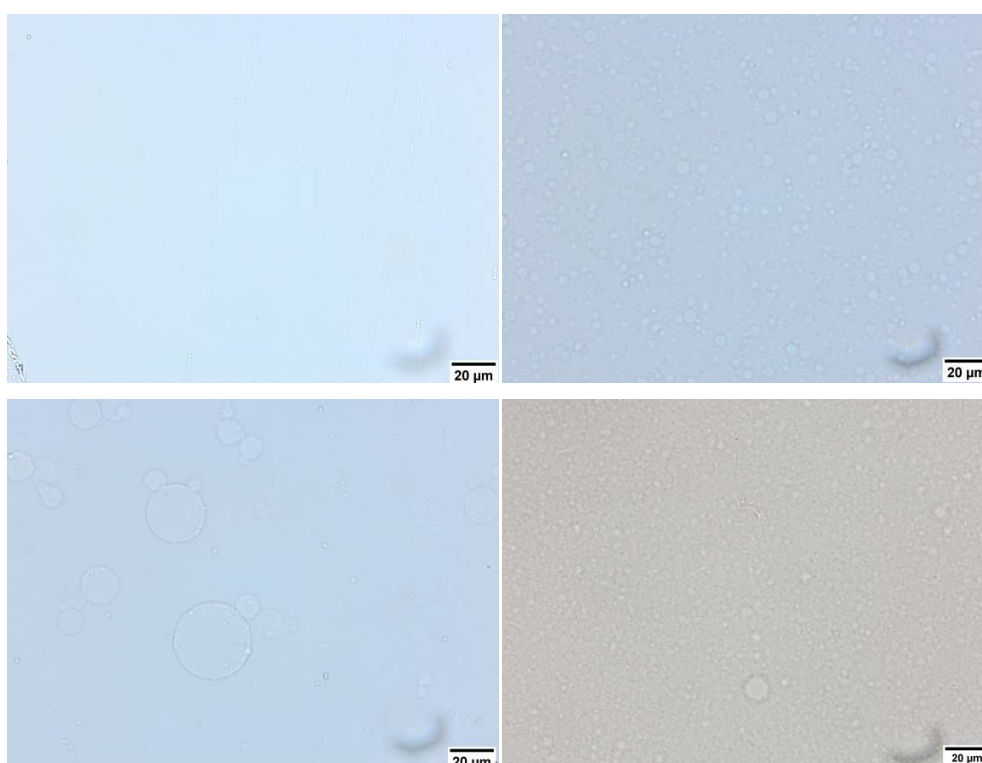

**Figure S3.** Optical micrographs for reaction mixture of 1-1 CP, 10, 30, 100 samples.

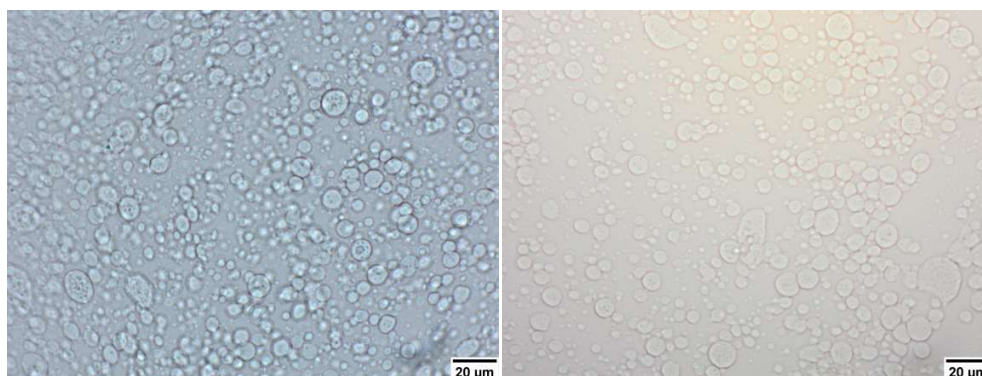

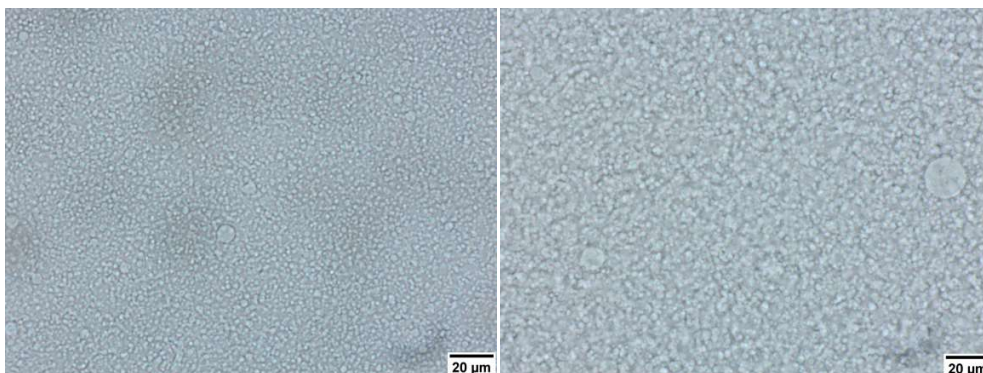

**Figure S4.** Optical micrographs for reaction mixture of 1-3 CP, 10, 30, 100 samples.

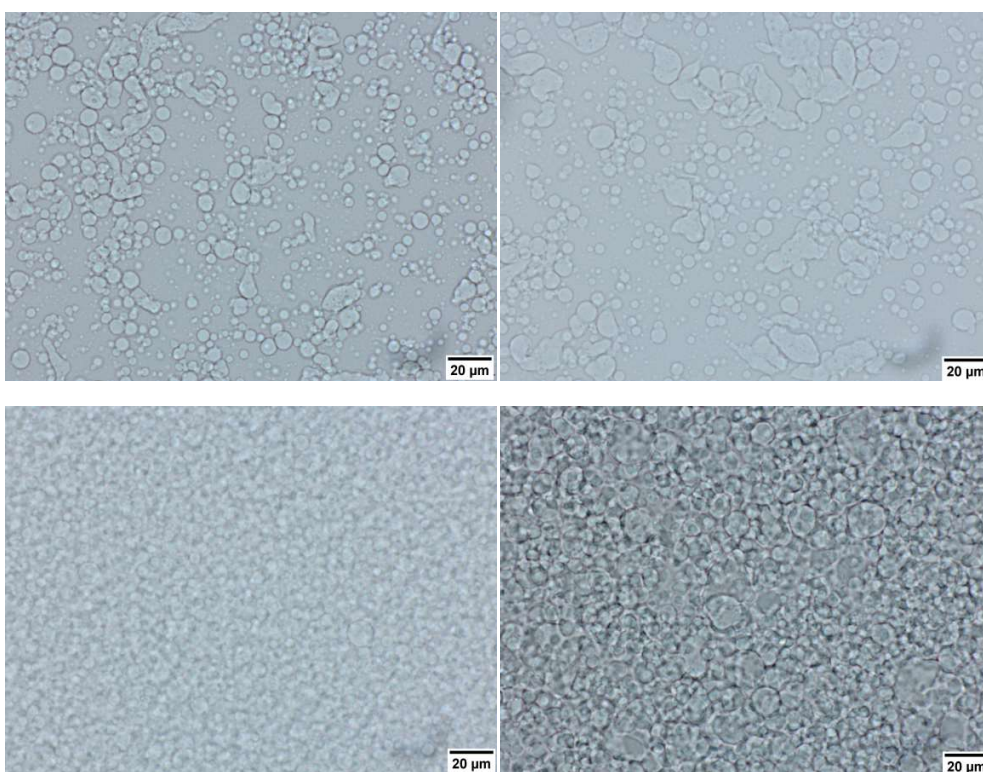

**Figure S5.** Optical micrographs for reaction mixture of 1-5 CP, 10, 30, 100 samples.

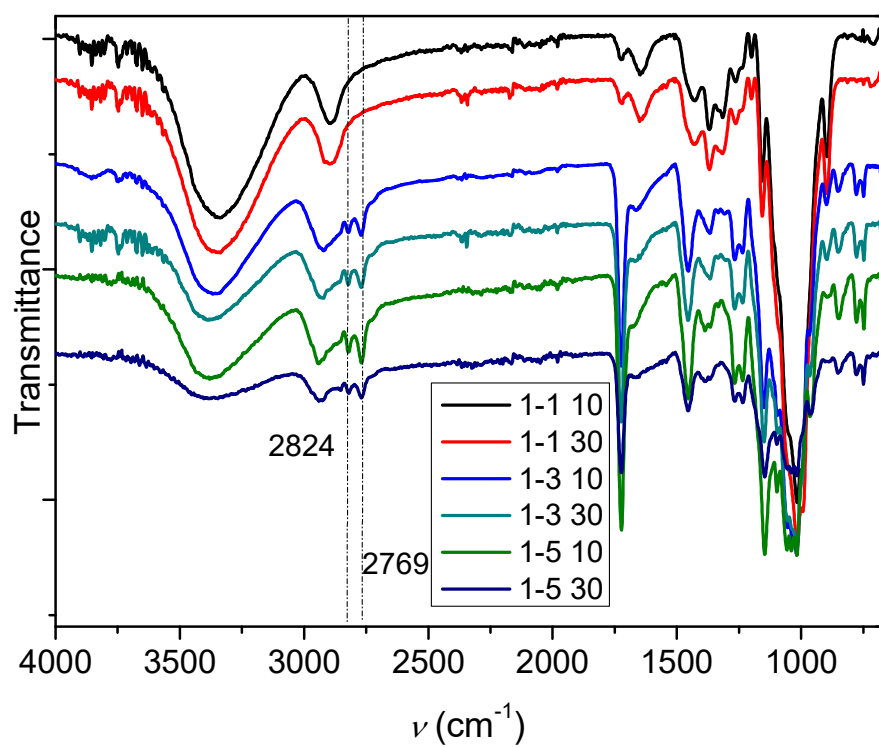

**Figure S6.** Infrared spectra of hydrogels 1-1, 1-3 and 1-5 irradiated with different doses (10, 30, 100 kGy).

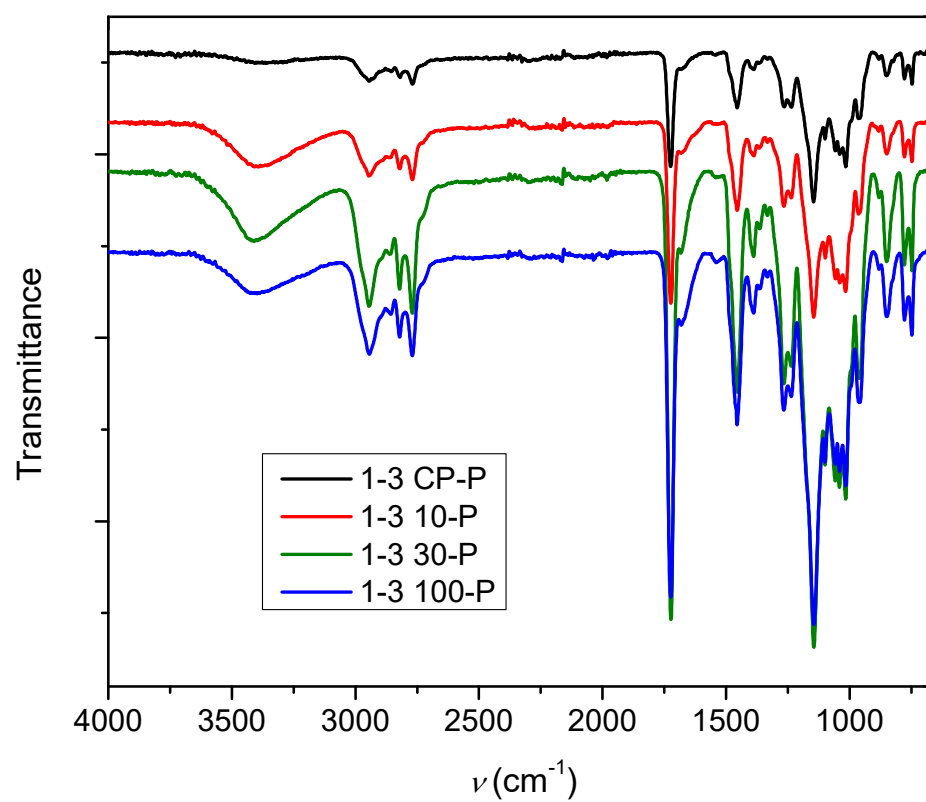

**Figure S7** Infrared spectra of samples obtained from precipitate after centrifugation (abbreviation P).

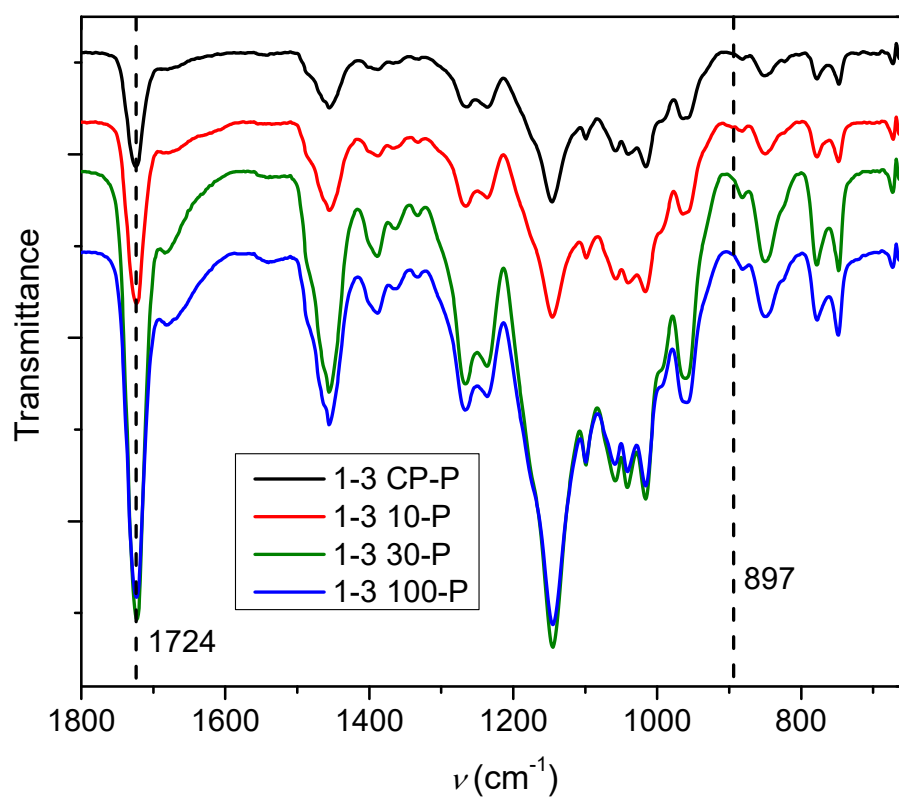

**Figure S8.** Infrared spectra of samples obtained from precipitate after centrifugation (abbreviation P) (magnified spectra).

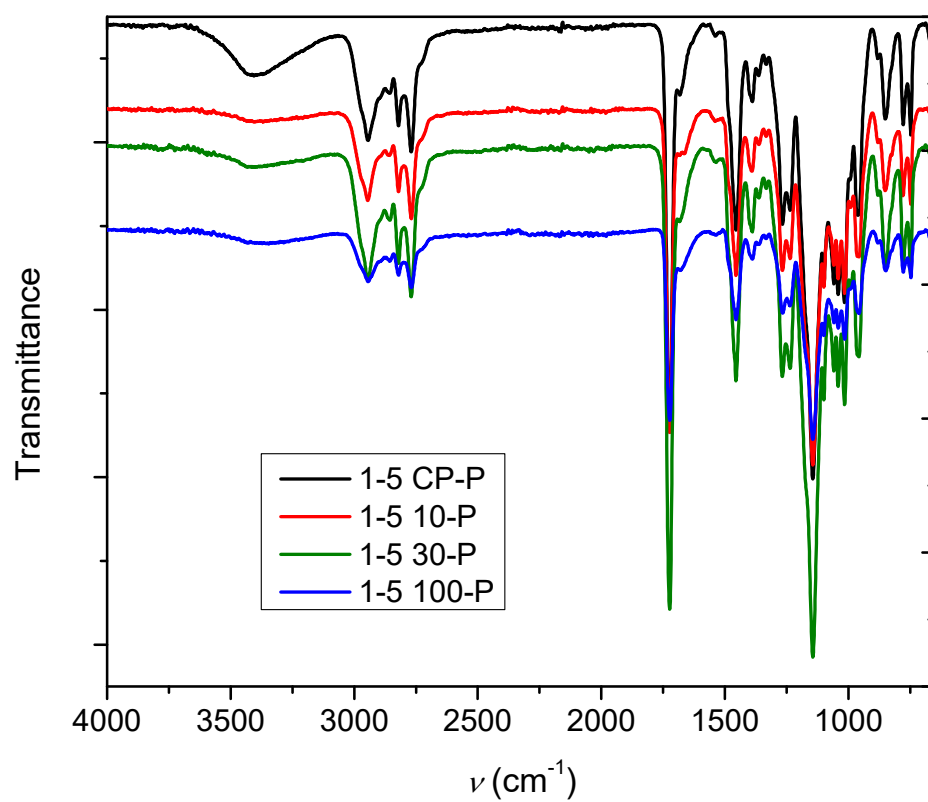

**Figure S9.** Infrared spectra of samples obtained from precipitate after centrifugation (abbreviation P) .



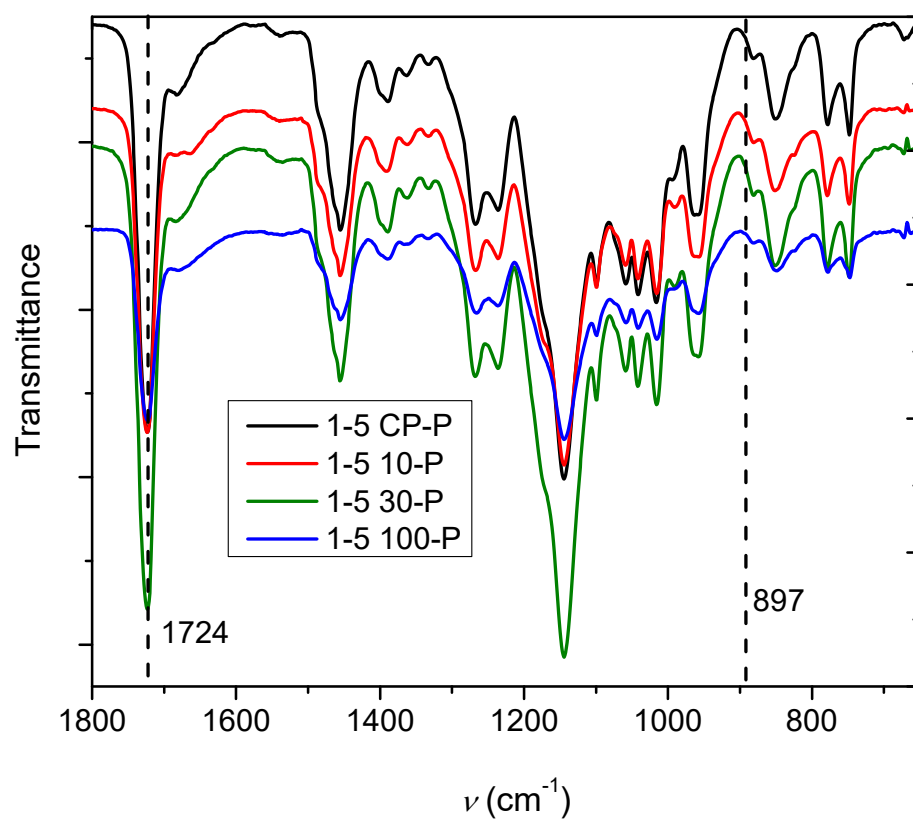

**Figure S10.** Infrared spectra of samples obtained from precipitate after centrifugation (abbreviation P) (magnified spectra).

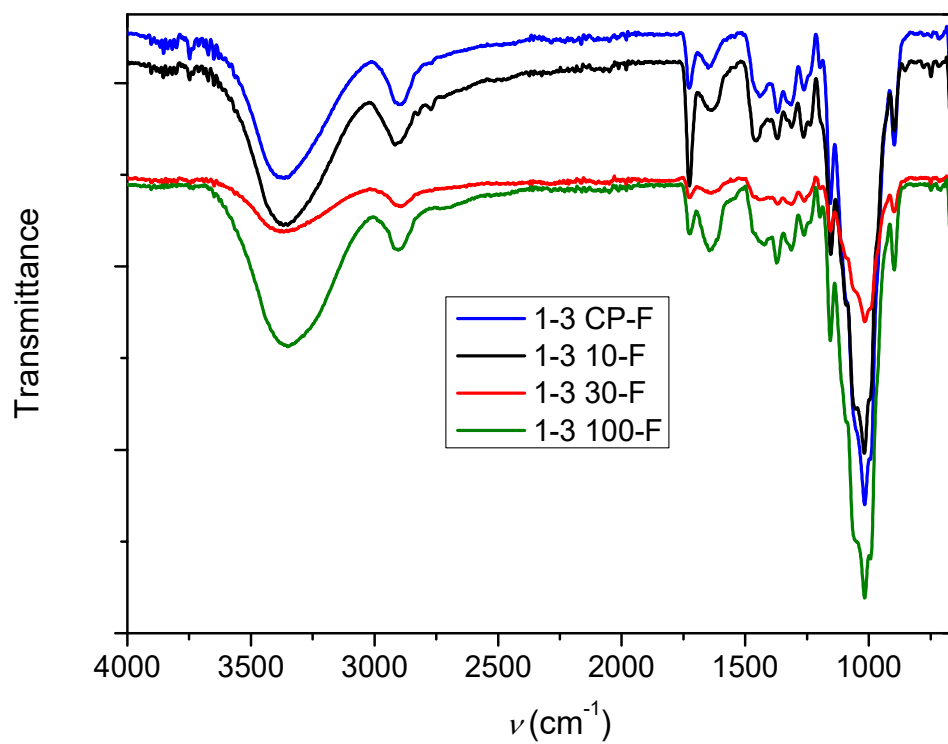

**Figure S11.** Infrared spectra of polymer precipitated from supernatant solution of 1-3 samples .

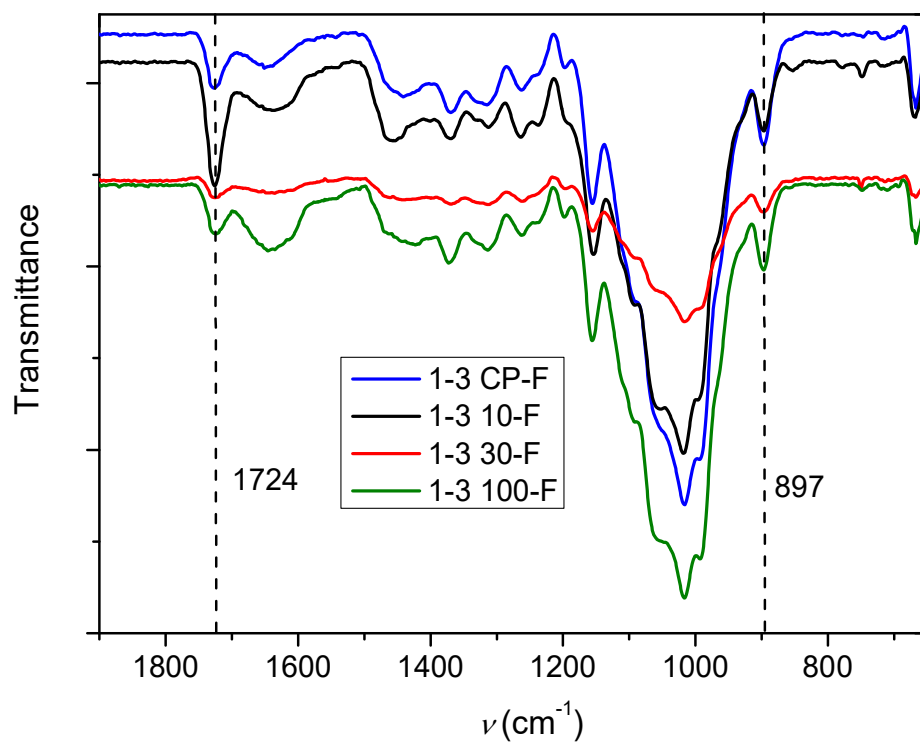

**Figure S12.** Infrared spectra of polymer precipitated from supernatant solution of 1-3 samples (magnified).

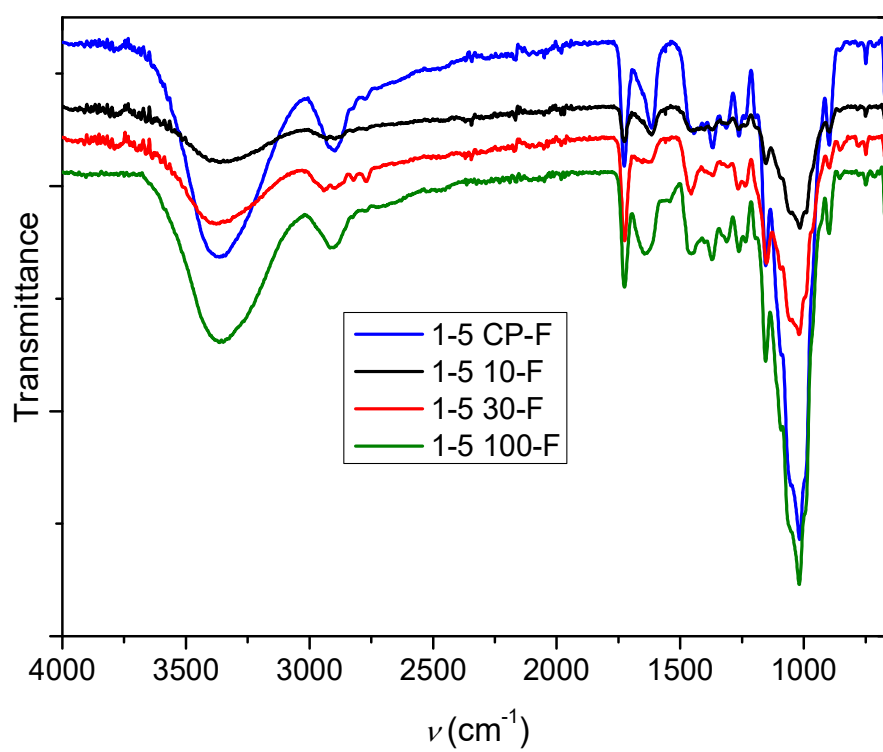

**Figure. S13.** Infrared spectra of polymer precipitated from supernatant solution of 1-5 samples.

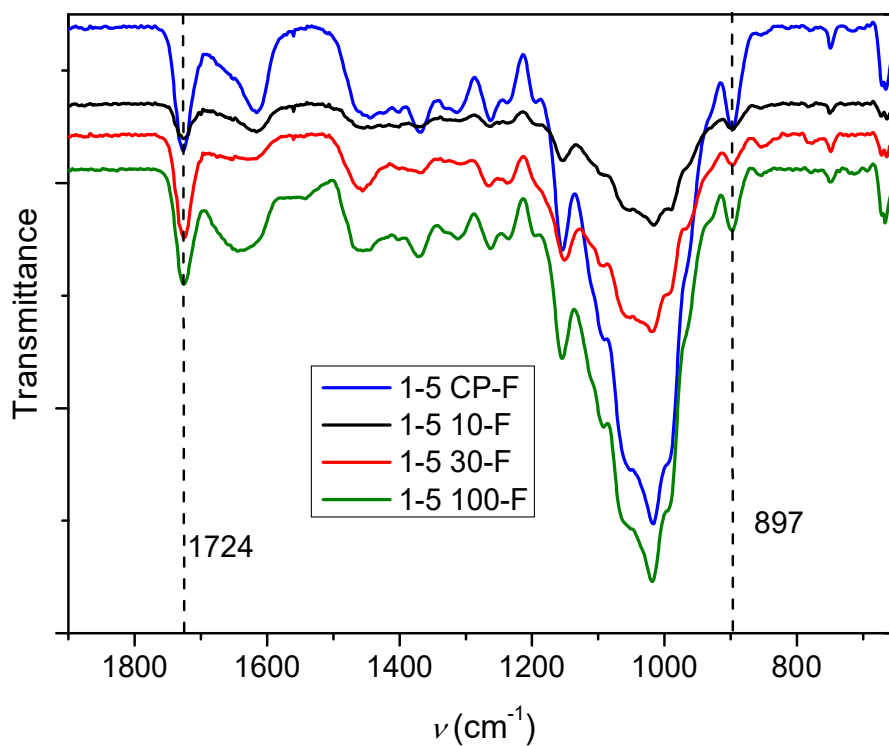

**Figure S14.** Infrared spectra of polymer precipitated from supernatant solution of 1-5 samples (magnified).

Table S2 Weight percentage of PDMAEMA microgel particles in reaction mixture

| Sample    | $w(\text{PDMAEMA microgel}) / \%$ |
|-----------|-----------------------------------|
| 1-3 CP-P  | 0.6                               |
| 1-3 10-P  | 1.1                               |
| 1-3 30-P  | 2.1                               |
| 1-3 100-P | 4.1                               |
| 1-5 CP-P  | 5.0                               |
| 1-5 10-P  | 5.3                               |
| 1-5 30-P  | 8.4                               |
| 1-5 100-P | 10.5                              |

Table S3 Values for critical strain of prepared hydrogels

| Sample    | $\log(\gamma_s)$ |
|-----------|------------------|
| Cellulose | 0.6              |
| 1-1 CP    | 0.9              |
| 1-1 100   | 1.2              |
| 1-3 CP    | 1.2              |
| 1-3 100   | 1.4              |
| 1-5 CP    | 1.0              |
| 1-5 100   | 1.2              |

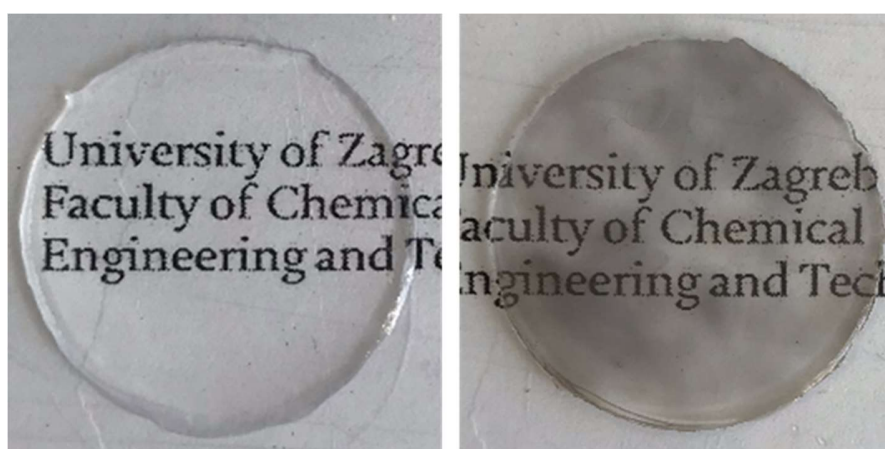

**Figure S15.** Prepared samples of neat cellulose before reaction with silver nitrate (left) and after reaction with silver nitrate (right).

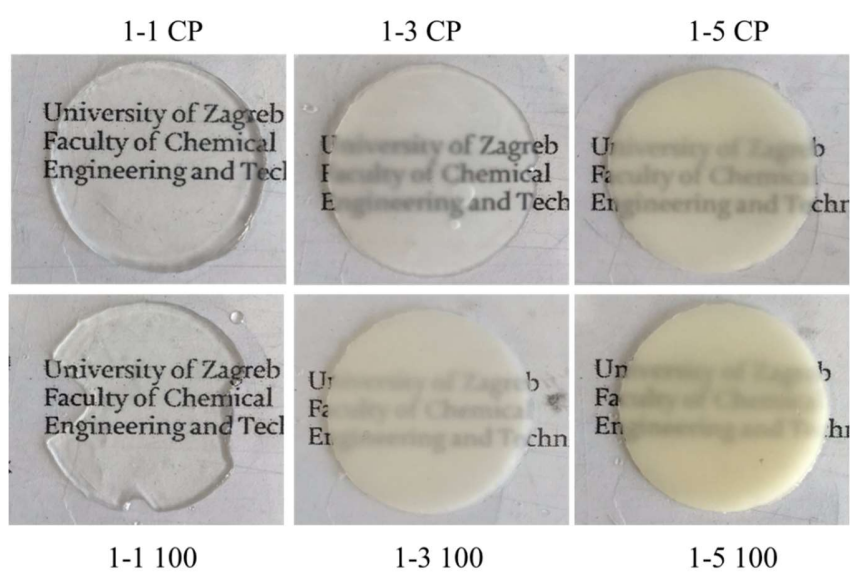

**Figure S16.** Prepared samples of hydrogels before reaction with silver nitrate.

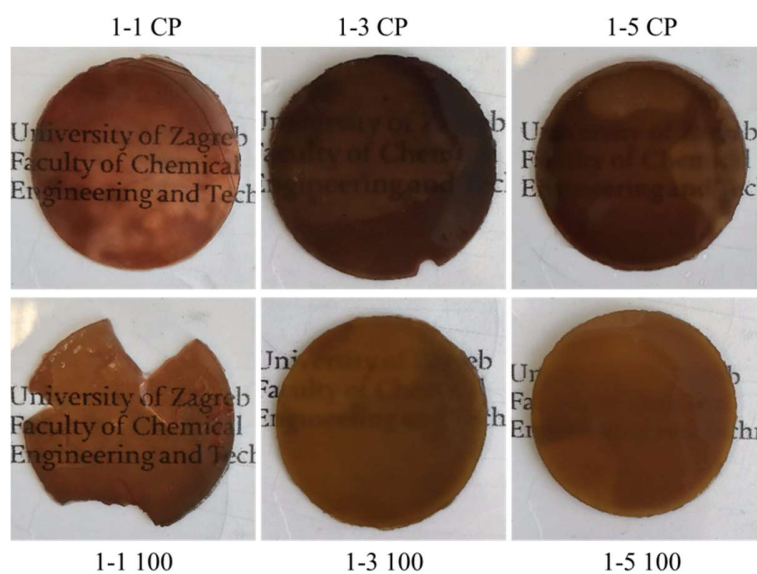

**Figure S17** Prepared samples of hydrogels after reaction with silver nitrate



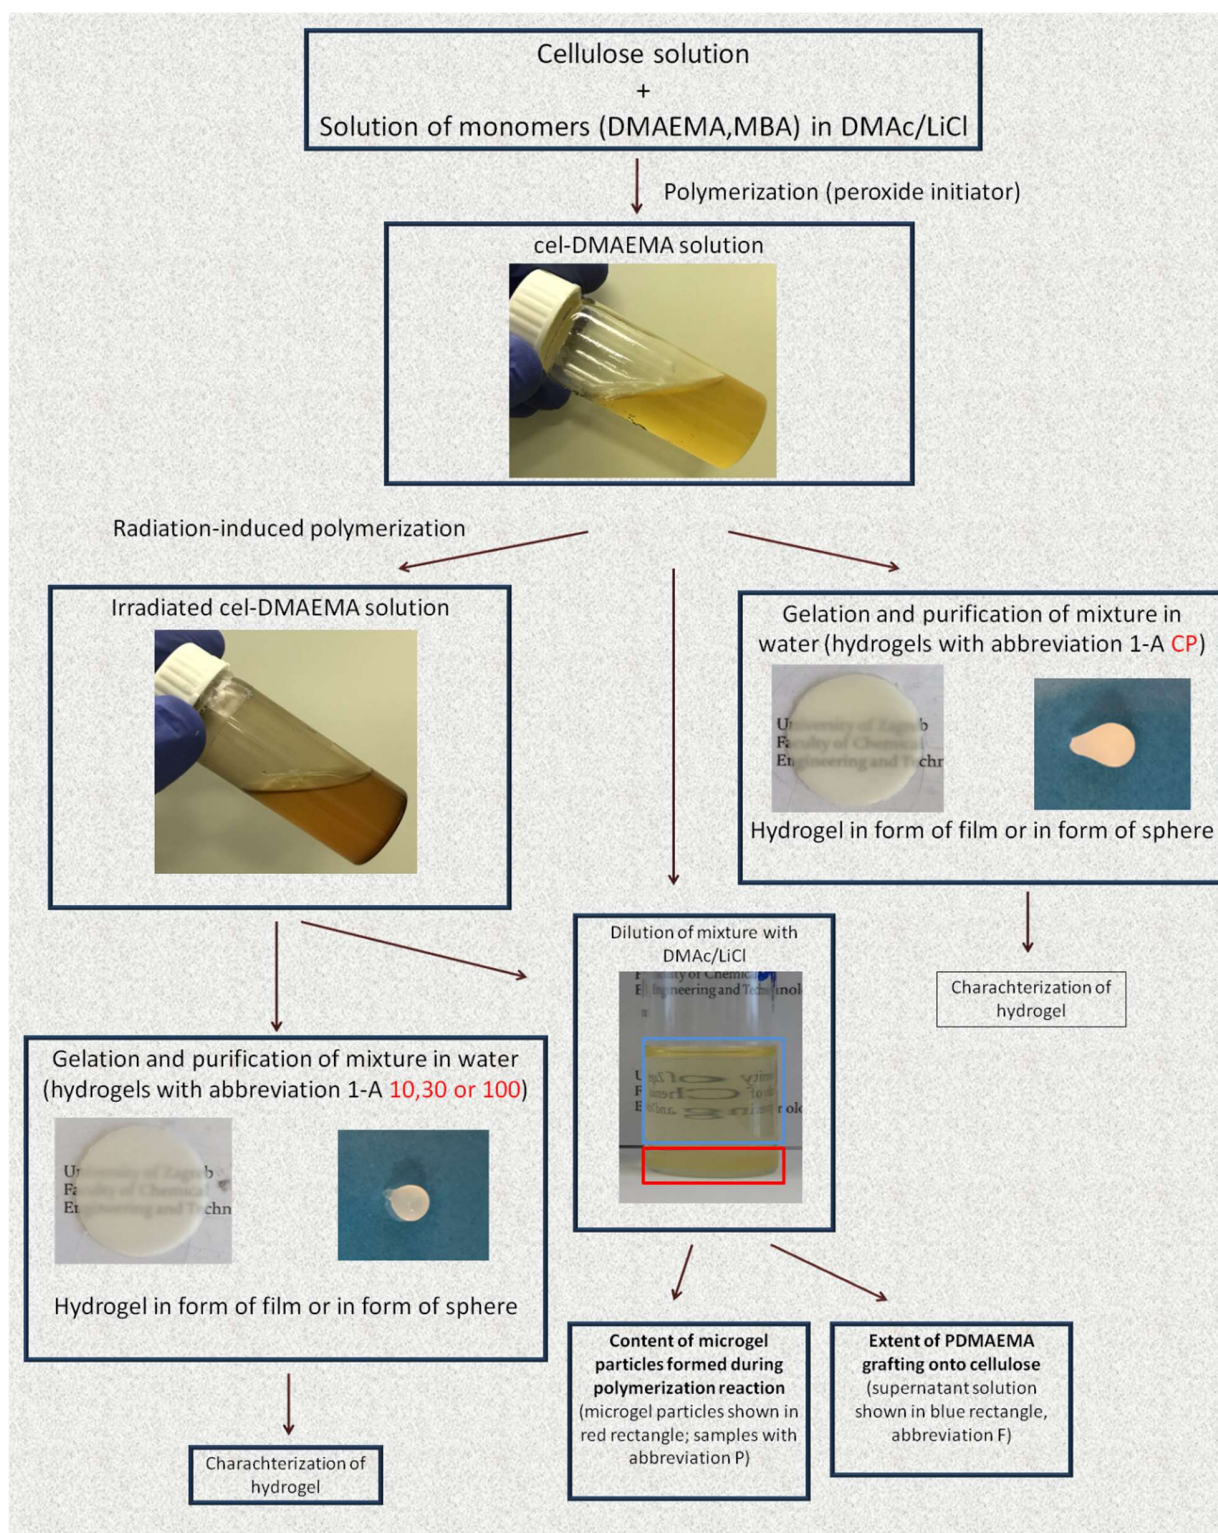

**Figure S18.** Synthesis and hydrogel preparation method.



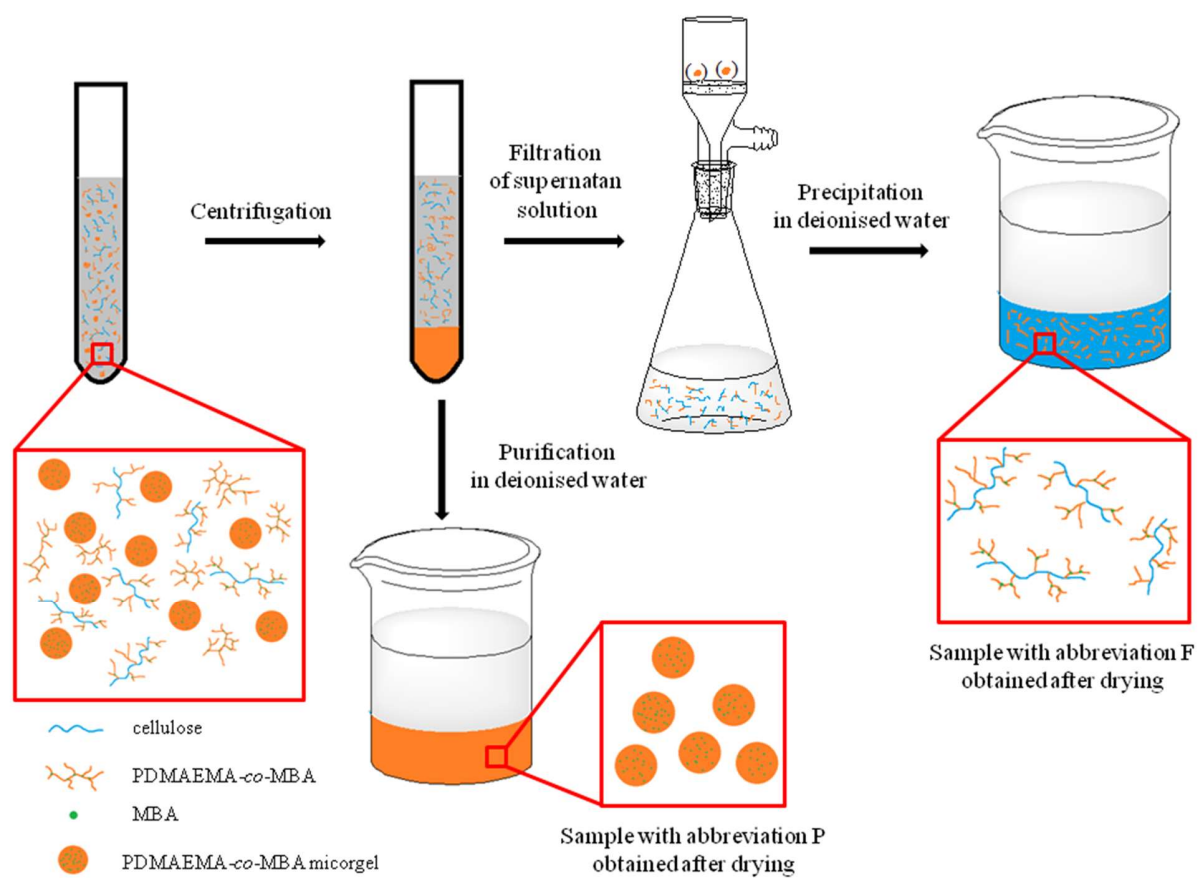

**Figure S19.** Separation of formed components after polymerization reaction in cellulose solution.
